# Supplementary material
Source: publisher figshare collection journal article supplement (https://tandf.figshare.com/ndownloader/files/21295503)
Supplement: Supplementary file 1 [file 21295503]

**SUPLEMENTARY INFORMATION**

**Table N° 1:** Capture sites, feeding sources and *T. cruzi* infection of different species of triatomines captured in the indigenous community 10 Leguas of the Paraguayan Chaco.

| Code | Village | Area of capture | Species | Sex/Nymphs (stage) | Food sources | *T. cruzi* infection |
| --- | --- | --- | --- | --- | --- | --- |
| T1 | 12 de Junio | Residential area | *Triatoma infestans* | V | human | negative |
| T2 | 12 de Junio | Residential area | *Triatoma infestans* | male | human | negative |
| T3 | 12 de Junio | Residential area | *Triatoma infestans* | female | human chicken | negative |
| T4 | 12 de Junio | Residential area | *Triatoma infestans* | female | human chicken | negative |
| T5 | 12 de Junio | Residential area | *Triatoma infestans* | V | human | negative |
| T6 | 12 de Junio | Residential area | *Triatoma infestans* | V | human chicken | negative |
| T7 | 12 de Junio | Residential area | *Triatoma infestans* | V | human | negative |
| T8 | 12 de Junio | Residential area | *Triatoma infestans* | female | human | negative |
| T9 | 12 de Junio | Residential area | *Triatoma infestans* | V | human chicken | negative |
| T10 | 12 de Junio | Residential area | *Triatoma infestans* | V | human | negative |
| T11 | 12 de Junio | Residential area | *Triatoma infestans* | male | human chicken | negative |
| T12 | 12 de Junio | Residential area | *Triatoma infestans* | male | human chicken | negative |
| T13 | 12 de Junio | Residential area | *Triatoma sordida* | female | human | negative |
| T14 | 12 de Junio | Residential area | *Triatoma sordida* | female | human chicken | negative |
| T15 | 12 de Junio | Residential area | *Triatoma sordida* | male | human | negative |
| T16 | 12 de Junio | Residential adjacent area | *Triatoma sordida* | male | human | negative |
| T17 | 12 de Junio | Residential adjacent area | *Triatoma infestans* | IV | human chicken | negative |
| T18 | 12 de Junio | Residential adjacent area | *Triatoma sordida* | female | human chicken | negative |
| T19 | 12 de Junio | Residential adjacent area | *Triatoma infestans* | V | human | negative |
| T20 | 12 de Junio | Residential adjacent area | *Triatoma sordida* | female | human chicken | negative |
| T21 | 12 de Junio | Residential adjacent area | *Triatoma sordida* | female | human chicken | negative |
| T22 | 12 de Junio | Residential adjacent area | *Triatoma infestans* | V | human | negative |
| T23 | 12 de Junio | Residential adjacent area | *Triatoma sordida* | female | human | negative |
| T24 | 12 de Junio | Residential adjacent area | *Triatoma infestans* | V | human chicken | negative |
| T25 | 12 de Junio | Residential adjacent area | *Triatoma infestans* | male | human | negative |
| T26 | 12 de Junio | Residential adjacent area | *Triatoma sordida* | IV | human dog | negative |
| T27 | 12 de Junio | Residential adjacent area | *Triatoma infestans* | V | chicken | negative |
| T28 | 12 de Junio | Residential adjacent area | *Triatoma infestans* | IV | human | negative |
| T29 | 12 de Junio | Residential adjacent area | *Triatoma sordida* | female | human chicken | negative |
| T30 | 12 de Junio | Residential adjacent area | *Triatoma sordida* | V | human | negative |
| T31 | Karandillas | Residential adjacent area | *Triatoma platensis* | V | chicken | negative |
| T32 | Karandillas | Residential adjacent area | *Triatoma platensis* | V | chicken | negative |
| T33 | Karandillas | Residential adjacent area | *Triatoma sordida* | V | chicken | negative |
| T34 | Karandillas | Residential adjacent area | *Triatoma platensis* | V | chicken | negative |
| T35 | Karandillas | Residential adjacent area | *Triatoma sordida* | V | chicken | negative |
| T36 | Tiberia | Residential adjacent area | *Triatoma sordida* | V | chicken | negative |
| T37 | Tiberia | Residential adjacent area | *Triatoma sordida* | IV | chicken | negative |
| T38 | Tiberia | Residential adjacent area | *Triatoma sordida* | female | chicken | negative |
| T39 | Tiberia | Residential adjacent area | *Triatoma sordida* | IV | chicken | negative |
| T40 | Tiberia | Residential adjacent area | *Triatoma sordida* | female | chicken | negative |
| T41 | Tiberia | Residential adjacent area | *Triatoma sordida* | IV | chicken | negative |
| T42 | Tiberia | Residential adjacent area | *Triatoma sordida* | female | chicken | negative |
| T43 | Tiberia | Residential adjacent area | *Triatoma sordida* | male | chicken | negative |
| T44 | Tiberia | Residential adjacent area | *Triatoma sordida* | male | chicken | negative |
| T45 | Tiberia | Residential adjacent area | *Triatoma sordida* | male | chicken | negative |
| T46 | Tiberia | Residential adjacent area | *Triatoma sordida* | male | chicken | negative |
| T47 | 12 de junio | Residential area | *Triatoma infestans* | V | negative | negative |
| T48 | 12 de Junio | Residential area | *Triatoma sordida* | V | negative | negative |
| T49 | 12 de junio | Residential adjacent area | *Triatoma infestans* | V | negative | negative |
| T50 | 12 de junio | Residential adjacent area | *Triatoma infestans* | V | negative | negative |
| T51 | 12 de junio | Residential adjacent area | *Triatoma sordida* | female | negative | negative |
| T52 | 12 de junio | Residential adjacent area | *Triatoma sordida* | female | negative | negative |
| T53 | 12 de junio | Residential adjacent area | *Triatoma sordida* | male | negative | negative |
| T54 | 12 de junio | Residential adjacent area | *Triatoma sordida* | V | negative | negative |
| T55 | 12 de junio | Residential adjacent area | *Triatoma infestans* | IV | negative | negative |
| T56 | 12 de junio | Residential adjacent area | *Triatoma infestans* | female | negative | negative |
| T57 | 12 de junio | Residential adjacent area | *Triatoma infestans* | female | negative | negative |
| T58 | Karandillas | Residential adjacent area | *Triatoma platensis* | V | negative | negative |
| T59 | Karandillas | Residential adjacent area | *Triatoma sordida* | male | negative | negative |
| T60 | Tiberia | Residential adjacent area | *Triatoma sordida* | V | negative | negative |
| T61 | Tiberia | Residential adjacent area | *Triatoma sordida* | V | negative | negative |
| T62 | Tiberia | Residential adjacent area | *Triatoma sordida* | V | negative | negative |
| T63 | Tiberia | Residential adjacent area | *Triatoma sordida* | female | negative | negative |
| T64 | Tiberia | Residential adjacent area | *Triatoma sordida* | male | negative | negative |
| T65 | Tiberia | Residential adjacent area | *Triatoma sordida* | female | negative | negative |
| T66 | Tiberia | Residential adjacent area | *Triatoma sordida* | male | negative | negative |
| T67 | Tiberia | Residential adjacent area | *Triatoma sordida* | male | negative | negative |
| T68 | Tiberia | Residential adjacent area | *Triatoma sordida* | female | negative | negative |
| T69 | Tiberia | Residential adjacent area | *Triatoma sordida* | V | negative | negative |
| T70 | Tiberia | Residential adjacent area | *Triatoma sordida* | V | negative | negative |
| T71 | Tiberia | Residential adjacent area | *Triatoma sordida* | female | negative | negative |
| T72 | Tiberia | Residential adjacent area | *Triatoma sordida* | male | negative | negative |
| T73 | Tiberia | Residential adjacent area | *Triatoma sordida* | male | negative | negative |
| T74 | Tiberia | Residential adjacent area | *Triatoma sordida* | male | negative | negative |
| T75 | Tiberia | Residential adjacent area | *Triatoma sordida* | male | negative | negative |
| T76 | Tiberia | Residential adjacent area | *Triatoma sordida* | male | negative | negative |
